# Supplementary material for: The differential effect of apoferritin-PbS nanocomposites on cell cycle progression in normal and cancerous cells
Source: Royal Society of Chemistry journal article supplement (doi:10.1039/c1jm13563e), 2011-11-07
Supplement: c1jm13563e.pdf [file c1jm13563e.pdf]

## Supplementary information

### The differential effect of apoferritin-PbS nanocomposites on cell cycle progression in normal and cancerous cells

Lyudmila Turyanska, Tracey D. Bradshaw, Mei Li, Philip Bardelang, William C. Drewe, Michael W. Fay, Stephen Mann, Amalia Patané, and Neil R. Thomas

Transmission electron microscopy (TEM) images of unstained and negatively stained Aft-PbS nanocomposites reveal uniform nanocomposites with diameter of  $\sim 12$  nm, each with an electron dense PbS central core surrounded by an Aft shell. The analysis of the unstained images show that the average diameter of PbS QDs is  $d = 5 \pm 2$  nm. Also High angle annular dark field scanning transmission electron microscopy (HAADF-STEM) and electron energy loss spectroscopy (EELS) studies across a single nanocomposite reveal the presence of amorphous carbon-rich shell around the PbS nanoparticle, thus proving the formation of Aft-PbS nanocomposite. For details of these studies see also Ref [1].

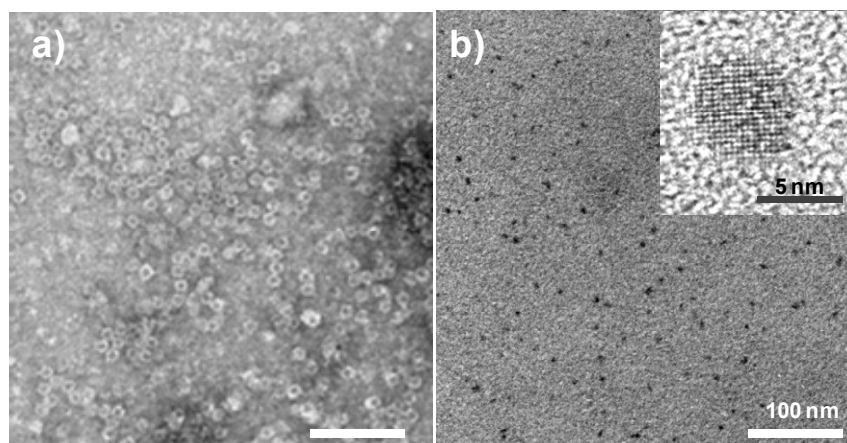

**Figure 1.** TEM images of Aft-PbS nanocomposites negatively stained with uranyl acetate (a) and unstained (b). Inset: HR TEM image of a PbS nanoparticle.

[1] B. Hennequin, L. Turyanska, T. Ben, A. M. Beltrán, S. I. Molina, M. Li, S. Mann, A. Patané and N. R. Thomas, *Adv. Mater.*, 2008, **20**, 3592-3596
